# Supplementary material
Source: PubMed Central journal article supplement (PMC4805488)
Supplement: NIHMS763171-supplement-2.pdf [file NIHMS763171-supplement-2.pdf]

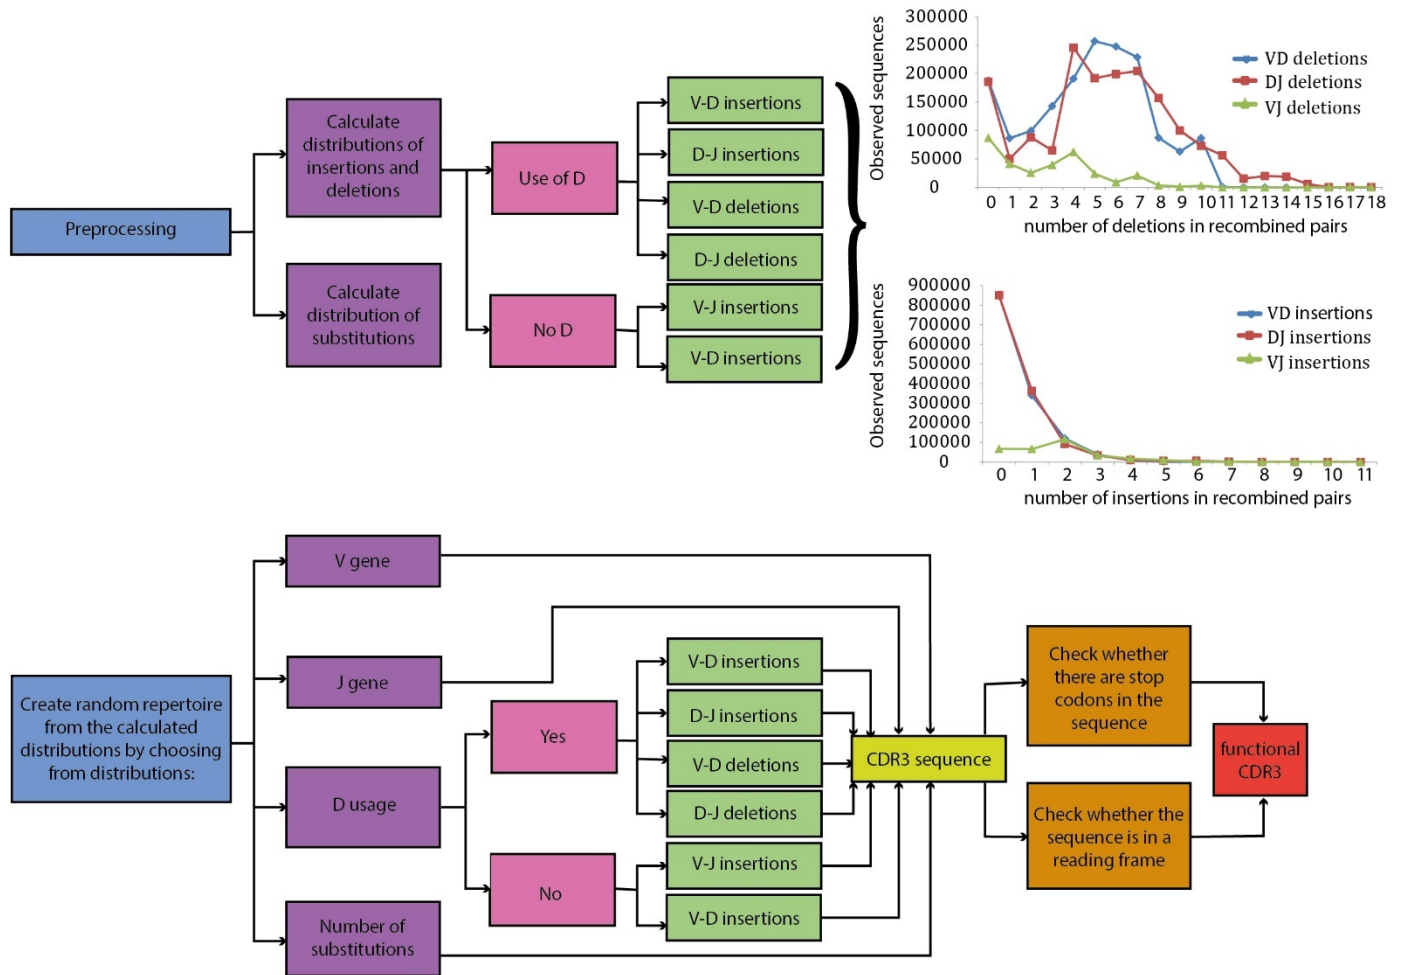

Figure S1

**A**

| Score          | Expect                                                        | Method                       | Identities    | Positives     | Gaps      |
|----------------|---------------------------------------------------------------|------------------------------|---------------|---------------|-----------|
| 298 bits (764) | 2e-10 <sup>9</sup>                                            | Compositional matrix adjust. | 149/149(100%) | 149/149(100%) | 0/149(0%) |
| Homo sapiens   | MADQLTEEQIAEFKEAFSLFDKDGSGTITTKELGTVMRSLGQNPTEAELQDMINEVDADG  |                              |               |               | 60        |
| Danio Rerio    | MADQLTEEQIAEFKEAFSLFDKDGSGTITTKELGTVMRSLGQNPTEAELQDMINEVDADG  |                              |               |               | 60        |
| Homo sapiens   | NGTIDFPEFLTMMARKMKDIDSEEEIIEAIFRVFDKDGNGYISAAELPHVMTNLGEKLIDE |                              |               |               | 120       |
| Danio rerio    | NGTIDFPEFLTMMARKMKDIDSEEEIIEAIFRVFDKDGNGYISAAELRHVMTNLGEKLIDE |                              |               |               | 120       |
| Homo sapiens   | EVDEMIREADIDGDGQVNYEEFVQMMTAK                                 |                              | 149           |               |           |
| Danio rerio    | EVDEMIREADIDGDGQVNYEEFVQMMTAK                                 |                              | 149           |               |           |

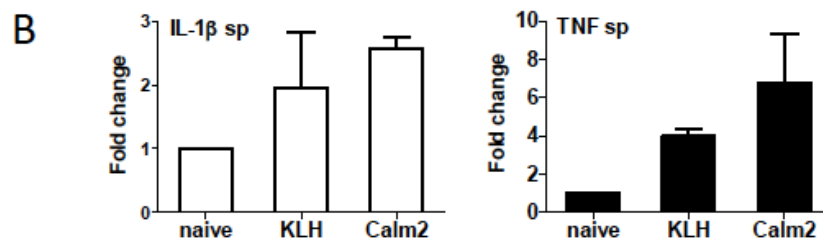

**Figure S2**

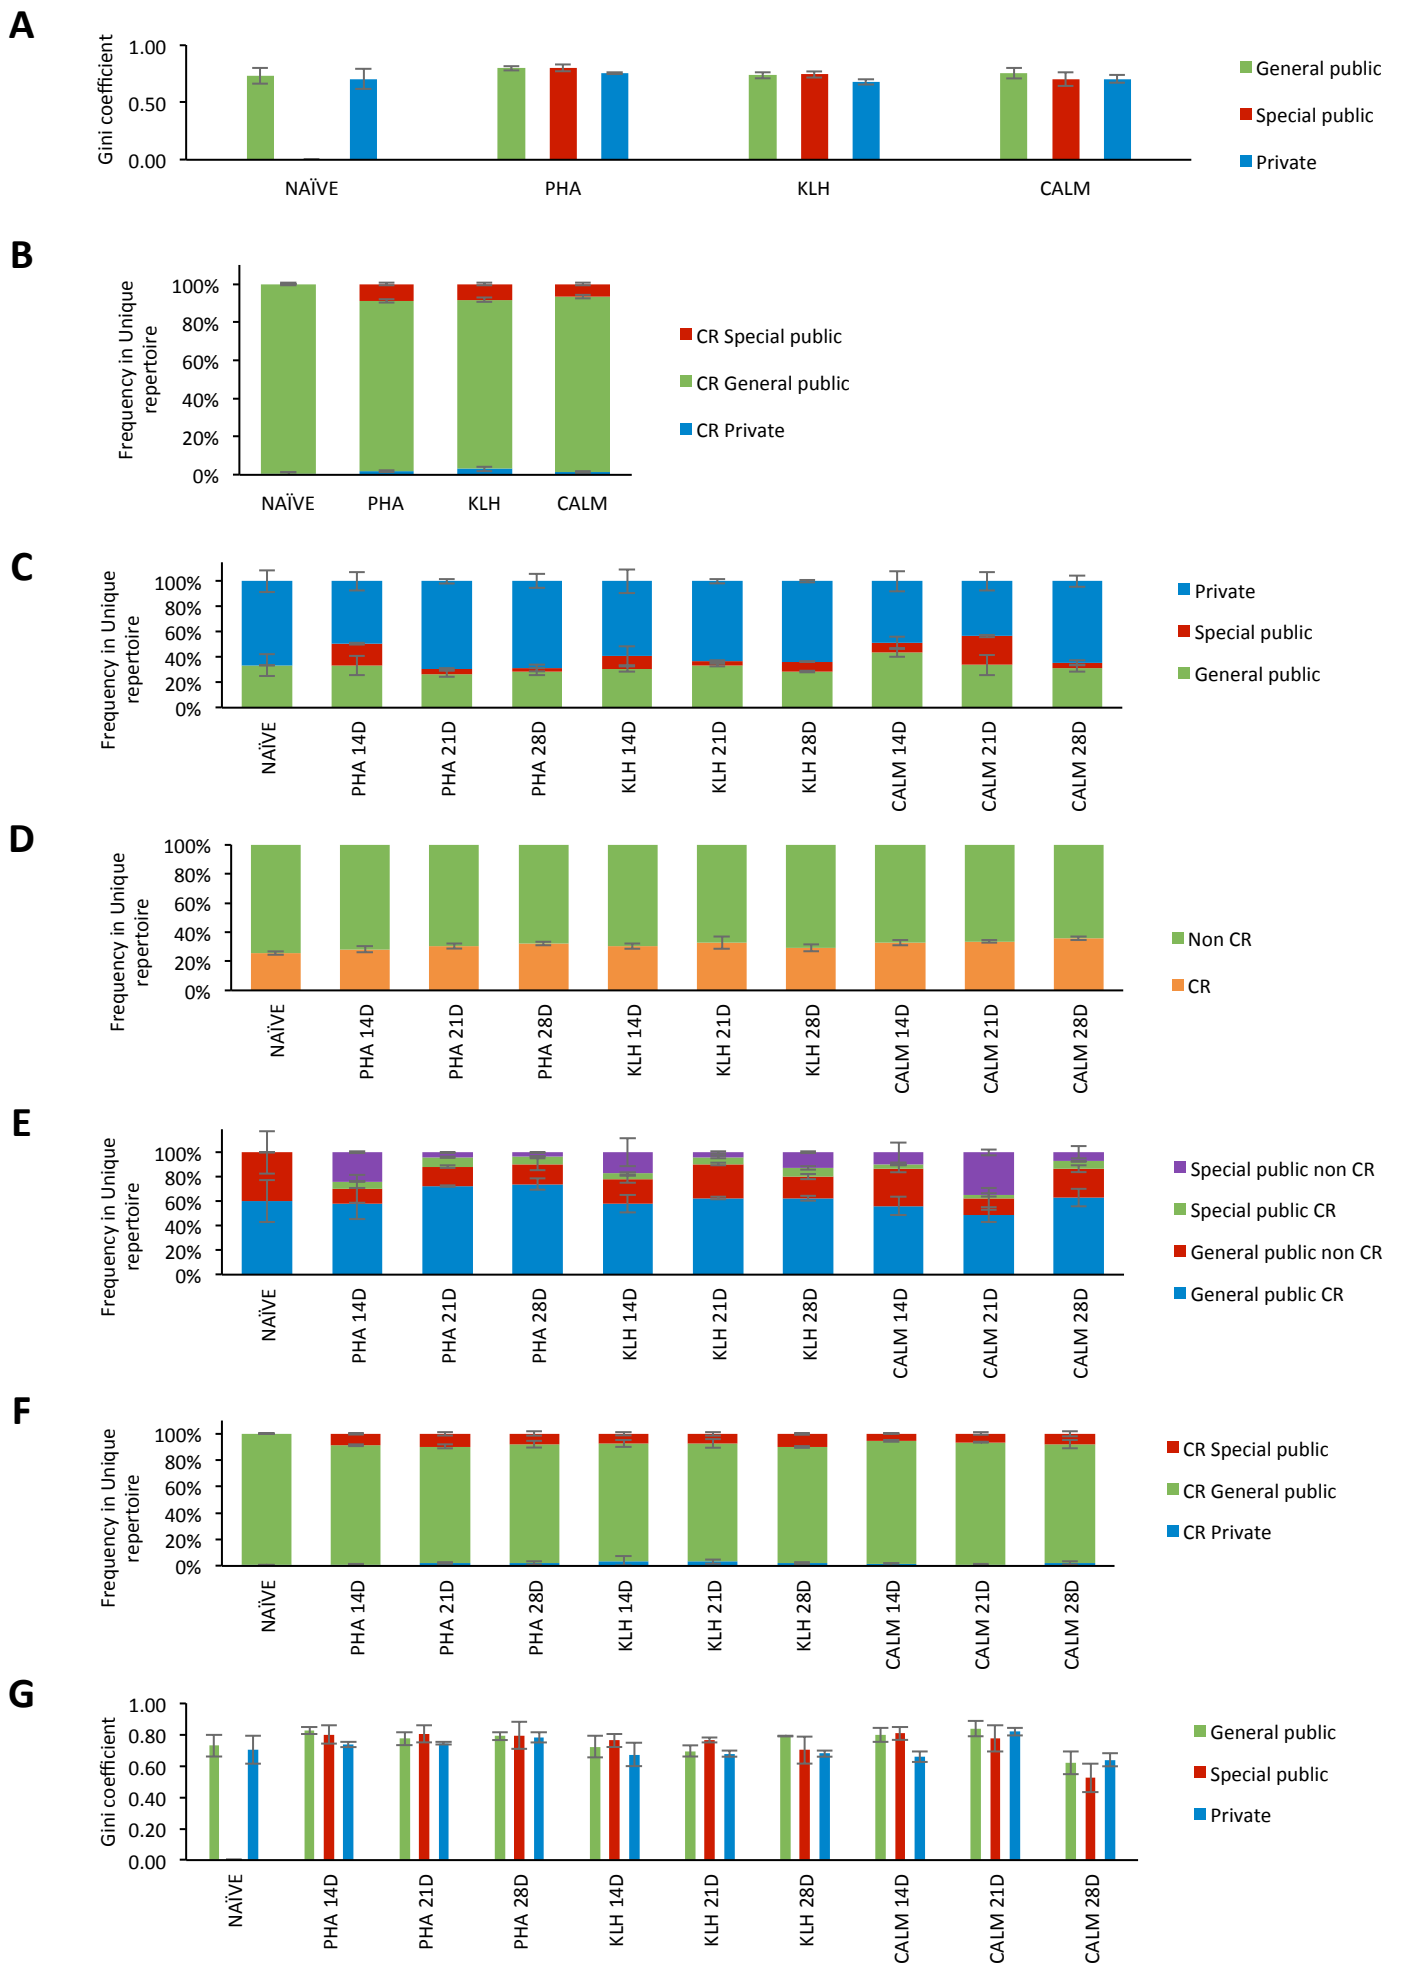

**Figure S3**

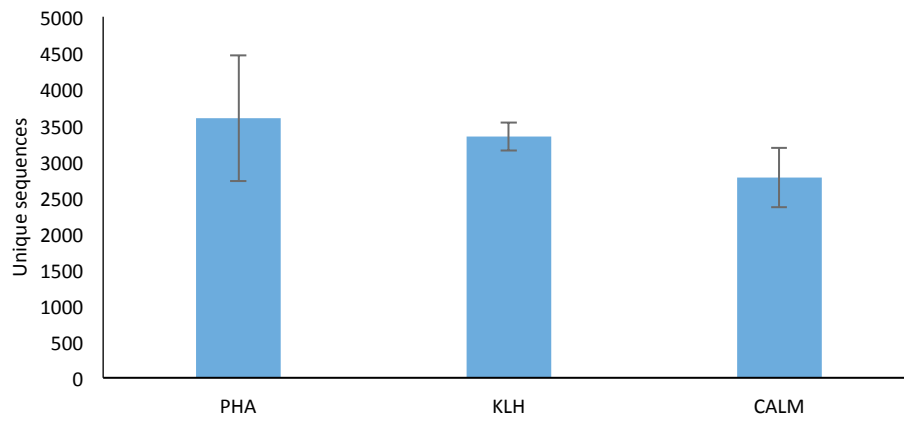

**Figure S4**

## Supplemental Information

### Supplemental Figure Legends

**Figure S1. Simulation of V,D,J recombination in zebrafish, related to Figure 1.** Different stages during the simulation that produces random TCR $\beta$ 1 repertoire sequences. The first step in the simulation is the pre-processing of sequencing data to obtain the distribution of the different events (deletions, insertions, substitutions) composing the variations leading to a full TCR $\beta$ 1 zebrafish repertoire. The second stage in the simulation is the production of the sequences that compose this synthetic simulated repertoire using the data obtain in the first stage.

**Figure S2. Zebrafish immunization, related to Figure 3.** (A) Alignment of human and zebrafish calmodulin 2 (Calm2) protein sequences. (B) Cytokine expression measured by qPCR in WKM+Spleens of male zebrafish immunized with KLH or Calm2 in IFA supplemented with LPS and CpG, one week after the booster injection. Mean  $\pm$  S.E.M, n=3, each n constitutes of pooled organs from 2-3 fish.

**Figure S3. Time course analysis of the response of the TCR $\beta$ 1 repertoire to stimulation, related to Figure 5.** (A) Gini coefficient analysis. (B) Fraction of general public, special public and private T cell clones within clones generated by convergent recombination in the unique repertoire. (C) Private, general public and special public fractions of the TCR $\beta$ 1 repertoire after immunization during different time points. (D) Convergent recombined clone fractions of the TCR $\beta$ 1 repertoire at different timepoints after treatment. (E) Fraction of the public repertoire within convergent recombined and non-convergent recombined clones of the TCR $\beta$ 1 repertoire at different timepoints after treatment. (F) Fraction of general public, special public and private clones within convergent recombined clones in the unique TCR $\beta$ 1 repertoire during different time points. (G) Gini coefficient analysis at different time points after treatment.

**Figure S4: Response of the TCR $\alpha$  repertoire to stimulation, related to Figure 6.** TCR $\alpha$  unique sequences in the different treatment groups.

**Table S1: Primers used, related to the Experimental Procedures.**

|                                | Sequence 5'-3'                                             | Purpose               |
|--------------------------------|------------------------------------------------------------|-----------------------|
| <b>Oligo(dT)12-18 primer</b>   | Invitrogen                                                 | RT-PCR                |
| <b>Smarter II A Oligo</b>      | AAGCAGTGGTATCAACGCAGAGTACXXXXX                             | RT-PCR                |
| <b>5' PCR primer IIA</b>       | SMARTer™Pico PCR cDNA Synthesis kit                        | Library amplification |
| <b>Cβ1 primer</b>              | CATTAGAATCTTTACGGATGGTTCACCTCTGGGA                         | Library amplification |
| <b>α primer</b>                | CACTTGGTAAATATTCGGCTTCACCTCAGT                             | Library amplification |
| <b>PE1 FCB ILL 1_2 V2</b>      | AATGATACGGCGACCACCGAGATCTACACTCTTCCCTACACGACGCTCTCCGATCT   | Barcode addition      |
| <b>PE2 CB1</b>                 | CAAGCAGAAGACGGCATAACGAGATCATTAGAACTTTACGGATGGTTCACCTCTGGGA | Barcode addition      |
| <b>PE1 ILL BC SPIIA 2_2 1</b>  | CACGACGCTCTCCGATCTNNCGTGATAAGCAGTGGTATCAACGCAGAGT          | Barcode addition      |
| <b>PE1 ILL BC SPIIA 2_2 2</b>  | CACGACGCTCTCCGATCTNNNACATCGAAGCAGTGGTATCAACGCAGAGT         | Barcode addition      |
| <b>PE1 ILL BC SPIIA 2_2 3</b>  | CACGACGCTCTCCGATCTNNNNGCCTAAAAGCAGTGGTATCAACGCAGAGT        | Barcode addition      |
| <b>PE1 ILL BC SPIIA 2_2 4</b>  | CACGACGCTCTCCGATCTNNTGGTCAAAGCAGTGGTATCAACGCAGAGT          | Barcode addition      |
| <b>PE1 ILL BC SPIIA 2_2 5</b>  | CACGACGCTCTCCGATCTNNNCACTGTAAGCAGTGGTATCAACGCAGAGT         | Barcode addition      |
| <b>PE1 ILL BC SPIIA 2_2 6</b>  | CACGACGCTCTCCGATCTNNNNATTGGCAAGCAGTGGTATCAACGCAGAGT        | Barcode addition      |
| <b>PE1 ILL BC SPIIA 2_2 7</b>  | CACGACGCTCTCCGATCTNNGATCTGAAGCAGTGGTATCAACGCAGAGT          | Barcode addition      |
| <b>PE1 ILL BC SPIIA 2_2 8</b>  | CACGACGCTCTCCGATCTNNNTCAAGTAAGCAGTGGTATCAACGCAGAGT         | Barcode addition      |
| <b>PE1 ILL BC SPIIA 2_2 9</b>  | CACGACGCTCTCCGATCTNNNNCTGATCAAGCAGTGGTATCAACGCAGAGT        | Barcode addition      |
| <b>PE1 ILL BC SPIIA 2_2 10</b> | CACGACGCTCTCCGATCTNNAAGCTAAAAGCAGTGGTATCAACGCAGAGT         | Barcode addition      |
| <b>PE1 ILL BC SPIIA 2_2 11</b> | CACGACGCTCTCCGATCTNNNGTAGCCAAGCAGTGGTATCAACGCAGAGT         | Barcode addition      |
| <b>PE1 ILL BC SPIIA 2_2 12</b> | CACGACGCTCTCCGATCTNNNNTACAAGAAGCAGTGGTATCAACGCAGAGT        | Barcode addition      |
| <b>PE1 ILL BC SPIIA 2_2 13</b> | CACGACGCTCTCCGATCTNNTTGACTAAGCAGTGGTATCAACGCAGAGT          | Barcode addition      |
| <b>PE1 ILL BC SPIIA 2_2 14</b> | CACGACGCTCTCCGATCTNNNGGAACTAAGCAGTGGTATCAACGCAGAGT         | Barcode addition      |
| <b>PE1 ILL BC SPIIA 2_2 15</b> | CACGACGCTCTCCGATCTNNNNTGACATAAGCAGTGGTATCAACGCAGAGT        | Barcode addition      |
| <b>PE1 ILL BC SPIIA 2_2 16</b> | CACGACGCTCTCCGATCTNNGGACGGAAGCAGTGGTATCAACGCAGAGT          | Barcode addition      |
| <b>PE1 ILL BC SPIIA 2_2 17</b> | CACGACGCTCTCCGATCTNNNCTTACAAGCAGTGGTATCAACGCAGAGT          | Barcode addition      |
| <b>PE1 ILL BC SPIIA 2_2 18</b> | CACGACGCTCTCCGATCTNNNNGCGGACAAGCAGTGGTATCAACGCAGAGT        | Barcode addition      |
| <b>PE1 ILL BC SPIIA 2_2 19</b> | CACGACGCTCTCCGATCTNNTTTCACAAGCAGTGGTATCAACGCAGAGT          | Barcode addition      |
| <b>PE1 ILL BC SPIIA 2_2 20</b> | CACGACGCTCTCCGATCTNNNNGGCCACAAGCAGTGGTATCAACGCAGAGT        | Barcode addition      |

**Table S2. The 100 most abundant TCR $\alpha$  and TCR $\beta$  clones and their frequencies. Related to Figure 7.**

| TCR $\alpha$  |           | TCR $\beta$    |           |
|---------------|-----------|----------------|-----------|
| AA SEQ        | Frequency | AA seq         | Frequency |
| ALNSQFKIF     | 0.0313    | AAYGQISGSYPAY  | 0.0124    |
| ALNYGNKIT     | 0.0288    | AARDRNYGDPAY   | 0.0079    |
| VTDSGGWKVI    | 0.0177    | AKQDRGRSEAH    | 0.0067    |
| ALQHTGSLGKII  | 0.0143    | AKQDGNNYNPAY   | 0.0067    |
| ALQPAGYKKII   | 0.0139    | AARERVGSSQAF   | 0.0064    |
| ALQPVGLEKII   | 0.0122    | ASRDNNRPAY     | 0.0064    |
| ALQPNYNKIT    | 0.0107    | AVSAAGNYQAY    | 0.0063    |
| ALNNNYKII     | 0.0098    | AARTATTSPAY    | 0.0062    |
| ALDAARKII     | 0.0094    | AASTGNNVNPAY   | 0.0061    |
| ALRTDSGGWKVI  | 0.0093    | AASAGQYDPAY    | 0.0060    |
| ALVPGTGLQKVI  | 0.0086    | AASTGNNYDPAY   | 0.0054    |
| ALVKTGGYGKII  | 0.0085    | AAGTGYRPAY     | 0.0038    |
| ALVTDTGGRKVI  | 0.0080    | AASRTGVNRPAY   | 0.0037    |
| ALHPGFNKLIM   | 0.0080    | AAYRQGVGSSQAF  | 0.0036    |
| ALNTGYKII     | 0.0075    | AASNTQAY       | 0.0036    |
| ALEPSGVKLI    | 0.0056    | AVSAARFNPAY    | 0.0032    |
| ALTSNWKVI     | 0.0052    | AANRVMGSEAH    | 0.0032    |
| ALDAGGGRKII   | 0.0051    | AAYYRTGASQAF   | 0.0030    |
| ALNQAGFQKLI   | 0.0051    | AAYDRSGGGAQAF  | 0.0029    |
| ALTSGVKLI     | 0.0049    | AAYYRDANPAI    | 0.0029    |
| ALQPTGNYKII   | 0.0049    | AVSTGDSASPAV   | 0.0028    |
| ALQPQSGSWKIH  | 0.0049    | AARGESQPAY     | 0.0028    |
| ALETSGDFAY    | 0.0048    | AARTGNRDPAY    | 0.0027    |
| ALDGSGRKII    | 0.0047    | AASLTSGYPAY    | 0.0026    |
| ALQYLGNKIV    | 0.0042    | AASHNRPAY      | 0.0025    |
| ALNDGTWKLH    | 0.0041    | AAFYTGTSGYPAY  | 0.0025    |
| ALMTNNRKIV    | 0.0040    | AARHNANPAI     | 0.0025    |
| ALVTAGYKLI    | 0.0040    | AACYNYQAY      | 0.0024    |
| ALQPAGNKII    | 0.0039    | AAGQSGLQAY     | 0.0024    |
| ALQPYGNKIT    | 0.0039    | AGHSGSYQAY     | 0.0023    |
| ALQTTSVKIV    | 0.0038    | AARELGSGGGAQAF | 0.0022    |
| ALQTTGGGGYKII | 0.0038    | AASKGHMGSEAH   | 0.0022    |
| ALRPNNQKLI    | 0.0038    | ASSIDTGASQAF   | 0.0022    |
| ALTQSGFKFI    | 0.0037    | AARTVYQDDPAY   | 0.0021    |
| ALALNANKII    | 0.0036    | AVRTGSANPAI    | 0.0021    |
| ALRTSSQWKLM   | 0.0035    | AAYTNMRPAY     | 0.0021    |
| AMENFNKIT     | 0.0035    | AAYNTGASQAF    | 0.0020    |
| ALNRGGVDKLI   | 0.0035    | AARDSFGSSQAF   | 0.0020    |
| ALVPYGNKIT    | 0.0035    | AKQMRQNYQAY    | 0.0020    |
| ALQPNNQKLI    | 0.0035    | ASSIGRNNRPAY   | 0.0020    |

|               |        |                |        |
|---------------|--------|----------------|--------|
| ALDANTNKMI    | 0.0033 | AASIQSQPAY     | 0.0019 |
| ALTQNAFKLI    | 0.0033 | AAYYRNNANPAI   | 0.0019 |
| ALQPNNYKII    | 0.0033 | AARDRQYDPAY    | 0.0019 |
| ALENYGNKII    | 0.0033 | AALDINTANPAI   | 0.0018 |
| ALATSVKIV     | 0.0032 | AAYYFNFPAY     | 0.0018 |
| ALQNYNKIT     | 0.0032 | AAYSTSGYPAY    | 0.0017 |
| AMEPDATRKII   | 0.0032 | AAMTISGLQAY    | 0.0017 |
| ALVTGTGVNKVI  | 0.0031 | AASGTNYQAY     | 0.0017 |
| ALNTGGLNKLI   | 0.0030 | AASGQGYPAY     | 0.0017 |
| ALQPNDGFKLF   | 0.0030 | AARQNFNPAY     | 0.0017 |
| ALNNNIKIV     | 0.0030 | AVSTNQYDPAY    | 0.0017 |
| ALVTQSGFKFI   | 0.0030 | AAFPGTQTQPAY   | 0.0016 |
| ALQPTGMASKIL  | 0.0030 | AARGLGSEAH     | 0.0016 |
| ALVPTGSLGKII  | 0.0028 | AAYYIGYRPAY    | 0.0016 |
| ALDTGGYGKII   | 0.0028 | AVRDNSTYPAY    | 0.0016 |
| ALTSSQWKLM    | 0.0028 | AASSGSYPAY     | 0.0016 |
| ALQDANTNKMI   | 0.0028 | AAYGGGAQAF     | 0.0016 |
| ALRLDTGGRKVI  | 0.0028 | AACTGTGNPAF    | 0.0016 |
| ALNVNKIT      | 0.0028 | AARDINYGDPAY   | 0.0016 |
| ALQNNNIKIV    | 0.0027 | AVRDRNYGDPAY   | 0.0016 |
| ALTFGATKII    | 0.0027 | SVSQQTGNPAF    | 0.0016 |
| ALQPTAGYKLI   | 0.0027 | AALDRTQPAY     | 0.0015 |
| VTNNQKLI      | 0.0026 | AASRDNQYDPAY   | 0.0015 |
| ALNTGGYGKII   | 0.0026 | AVSDRSTTSPAY   | 0.0015 |
| ALVPGTGVNKVI  | 0.0026 | AAYDNYQAY      | 0.0015 |
| AMVPSGSGLYKVI | 0.0026 | AAYYSTSGYPAY   | 0.0015 |
| AMETQTGLQKIL  | 0.0025 | AARQGKSQPAY    | 0.0015 |
| ALVNDAYKIY    | 0.0025 | AAWTNSGYPAY    | 0.0015 |
| AMAQTGLQKIL   | 0.0025 | AAYRENRPAY     | 0.0015 |
| ALQNTGYKMV    | 0.0025 | AASINSGGGAQAF  | 0.0015 |
| ALQPSSYGGKLI  | 0.0025 | AVRTGFGSSQAF   | 0.0014 |
| ALDGSLKII     | 0.0024 | AARQGNTQAY     | 0.0014 |
| ALRPAGYKLI    | 0.0024 | AAYYQSQPAY     | 0.0014 |
| AMVKTGGYGKII  | 0.0024 | AAYGGFGSSQAF   | 0.0014 |
| ALTDGGWKVI    | 0.0024 | AARQDNYDPAY    | 0.0014 |
| ALRNQAGFQKLI  | 0.0024 | AARTGNYGDPAY   | 0.0014 |
| ALTTSGGIKII   | 0.0024 | AARQGSSQAF     | 0.0014 |
| ALVPGSGLKII   | 0.0024 | AVSAGGYQAY     | 0.0014 |
| ALMTTGVKII    | 0.0024 | AAFYGNTQAY     | 0.0013 |
| ALVPDAARKII   | 0.0023 | AARDNYDPAY     | 0.0013 |
| ALVPTGGYGKII  | 0.0023 | AAYYQGNQAY     | 0.0013 |
| ALDGAARKIF    | 0.0023 | AASLGAGYPAY    | 0.0013 |
| ALVTTSVKIV    | 0.0023 | AARTGYDPAY     | 0.0013 |
| ALNYGNNKIT    | 0.0023 | AKQDTGSGAGAQAF | 0.0013 |
| ALVPNNRKIV    | 0.0023 | AASNMGSEAH     | 0.0013 |



|                      |        |                     |        |
|----------------------|--------|---------------------|--------|
| <b>ALKPTGGGYKLI</b>  | 0.0022 | <b>AARAGGMGSEAH</b> | 0.0013 |
| <b>ALRPDSQFKIF</b>   | 0.0022 | <b>AASDTQAY</b>     | 0.0013 |
| <b>ALNYGSGNYKLI</b>  | 0.0022 | <b>AAYNNFNPAY</b>   | 0.0013 |
| <b>ALQPDSGGWKVI</b>  | 0.0022 | <b>AASLGNYQAY</b>   | 0.0013 |
| <b>ALEPTGGLNKLI</b>  | 0.0022 | <b>AARELGTTSPAY</b> | 0.0013 |
| <b>ALQDGSGRKII</b>   | 0.0021 | <b>AARESQPAY</b>    | 0.0013 |
| <b>ALQPTSGGIKII</b>  | 0.0021 | <b>AAYYDNNRPAY</b>  | 0.0013 |
| <b>ALDGSGTKII</b>    | 0.0021 | <b>AAYYSTANPAI</b>  | 0.0013 |
| <b>ALEPTNNLKIV</b>   | 0.0021 | <b>AAYTGDPAY</b>    | 0.0013 |
| <b>ALRPQSGFKFI</b>   | 0.0021 | <b>AAREGGTQPAY</b>  | 0.0013 |
| <b>ALQTGSGNWKII</b>  | 0.0021 | <b>AASYAQYDPAY</b>  | 0.0013 |
| <b>ALQPNAGGLSKLM</b> | 0.0021 | <b>AAYSGTGYGQAY</b> | 0.0013 |
| <b>ALVPNAQKII</b>    | 0.0021 | <b>AVSADYQAY</b>    | 0.0012 |
| <b>ALNAGQKLI</b>     | 0.0020 | <b>AARQNNYDPAY</b>  | 0.0012 |
| <b>ALTYTGAQKLI</b>   | 0.0020 | <b>AASYTSGYPAY</b>  | 0.0012 |

## Experimental Procedures

**Fish maintenance.** 1 year old male zebrafish (AB strain) were maintained in a 28-30°C system with a 14/10 hrs light/dark cycle. All experiments were carried out in accordance with guidelines by the Institutional Animal Care and Use Committee of Harvard Medical School.

**Immunization.** Fish were anaesthetized using 0.02% Tricaine methanesulfonate (Sigma-Aldrich) and immunized intra-peritoneally (i.p.) with a 10µl emulsion containing 1:1 Incomplete Freund's Adjuvant (IFA, Difco Laboratories) and 90% PBS (Invitrogen), 0.25µg lipopolysaccharide (ultrapure LPS, Invivogen), 0.7µg CpG Oligonucleotide ODN 1826 (Invivogen) and 2 µg of either PHA (Sigma-Aldrich), KLH (Sigma-Aldrich) or CALM (Creative BioMart, NY, USA). Two weeks later the fish were boosted with PHA, KLH or CALM in 1:1 IFA: 90% PBS.

We measured cytokine transcripts in spleens, whole kidney marrow and intestines from immunized fish, 7 days after boosting. Total RNA was purified with TRIzol® Reagent. The reverse transcription reaction was prepared from 800ng total RNA using the High capacity cDNA reverse transcription kit (Applied Biosystems). The qRT-PCR was performed on a VIIA™7 Real-time PCR System (Applied Biosystems) using a SybrGreen-based reaction from Takara (SYBR®Premix Ex Taq™ II, Takara Bio Inc.). The amplification program was 95°C 30sec; 95°C 5 sec, 60°C 30sec for 40 cycles; and the melting curve 95°C 15 sec, 60°C 1min for 1 cycle. The primers were designed to span over exon-exon borders using the Primer3Plus program (<http://www.bioinformatics.nl/cgi-bin/primer3plus/primer3plus.cgi>). Relative mRNA expression was calculated using the 2<sup>-ΔCt</sup> formula with β-actin as the reference gene.

**mRNA isolation, reverse transcription and 5' RACE.** Total RNA was extracted from whole fish homogenate using Trizol® reagent (Life Technologies) and mini spin columns (Qiagen). After phase separation using Trizol and chloroform (Sigma-Aldrich), the upper phase was mixed with equal amounts of 70% ethanol (Sigma-Aldrich) and placed on top of a mini spin column (Qiagen). The rest of the procedure was performed according to the manufacturer's protocol (Qiagen) including the on-column DNase digestion (RNase-free DNase set from Qiagen). mRNA was purified using µMACS™ mRNA isolation kits from Miltenyi Biotec and 160ng was used for reverse transcription using SuperScript™ II Reverse Transcriptase (Invitrogen) 0.5µg Oligo(dT)12-18 primer (Invitrogen) and 12pmol of SMARTer II A Oligonucleotide (Clontech). The cDNA was double purified using NucleoSpin® columns (Clontech) and Agencourt® AMPure®XP beads (Beckman Coulter).

**Library amplification and barcode addition.** cDNA from each of fish (70ng) was used for TCRβ/α chain library amplification using Advantage® cDNA Polymerase mix (Clontech) with 10pmol of the 5' PCR primer IIA from the SMARTer™ Pico PCR cDNA Synthesis kit (Clontech) and the constant region primer (**Table S1**). SybrGreen (Invitrogen) diluted in TE buffer was added to the reaction at 0.4X end dilution. As amplification references, the fluorescent standards from the Real-time Library Amplification kit (KAPA Biosystems) were used. The library was amplified using a VIIA™7 Real-time PCR System (Applied Biosystems) and the amplification program was: 95°C 5min; 95°C 30 sec, 72°C 2min15sec for 5 cycles; 95°C 30 sec, 68°C 2min 15 sec, n cycles (number of cycles needed for the PCR to reach an amplification level between fluorescent standard 1 and 3). The library was gel-purified using a double-comb 2% agarose E-gel® (Invitrogen) and barcodes were added to 150ng of library DNA using the same reaction as for the library amplification and the primers listed in **Table S1**. The program used was: 95°C 5min; 98°C 20 sec, 54°C 30 sec, 68°C 2min15sec for 2 cycles; 98°C 20 sec, 68°C 2min 15 sec for 10 cycles. The PCR products were purified using Agencourt AMPure XP beads and quantified a Library Quantification kit (KAPA Biosystems).

**Verification of TCR library amplification.** To verify the specificity of the C-region primer, the PCR library product amplified with the oligo dT primer and the C-region primer was sequenced. First, the PCR product was ligated into a TOPO-XL vector (Invitrogen). Chemically competent OneShot®TOP10 *Echerichia coli* (Invitrogen) were transformed with the library construct and 5 different colonies were picked and sequenced at the Dana-Farber/Harvard Cancer Center DNA Resource Core using the T7 primer.

**Annotation and quality control.** TCRβ and TCRα annotation was performed by using NCBI BLAST+ to identify the V and J germline genes of a TCR read, and then the CDR3 was determined by finding the conserved cysteine at the 5' end of the CDR3 and the conserved Phenylalanine at the 3' end of the CDR3.

The numbers of nucleotide additions was determined by taking the length of the CDR3 nucleotides and subtracting the number of nucleotides encoded by the V, J and D genes. A germline index was calculated by dividing the number of nucleotides in the CDR3 encoded by V, J and D genes by the length of the CDR3 producing a value between 0.0 and 1.0.

To identify potential sequencing errors, TCR $\beta$  species represented by a single sequencing read (that is, having a count of 1) were discarded. Additionally, the coverage was calculated for each sequenced sample. The coverage was defined as: total count of annotated reads / cell count used for library generation. TCR $\beta$ 1 species represented by fewer reads than half of the coverage were then discarded, so that if a TCR $\beta$ 1 species is represented by 4 reads and the coverage is 10x, that TCR $\beta$ 1 species will be discarded.

PCR amplification error was addressed by identifying species in which the same V and J genes were used and the CDR3 was of the same length, but varied by only one nucleotide. The count of the species pair was then probed and if species A was found to be less than 5% of species B, then species A would be discarded as the likely product of PCR amplification error.

**Simulation.** To simulate V(D)J recombination and production of CDR3 sequences we used two distinct approaches – data based and random based. In both cases, the simulation follows the following mechanisms: V (D) combination, VD (J) combination, VD nucleotide deletion, DJ nucleotide deletion, nucleotide substitutions (**Suppl. Fig. 1**). In one approach, we calculated these parameters out of available sequencing by iterating over sequenced recombined regions and obtaining V,J,D, deletion, insertion and substitution. During simulation, once V and D segments were chosen (in zebrafish, the choice for D stands between the single D segment being used or not used), parameters for deletion/insertion were selected according to the distribution of deletion segments obtained from sequencing; see **Suppl. Fig 1** for the actual values obtained for deletions, insertions, and the obtained V(D)J segment lengths used in CDR3. The random based version of the simulation was using random choices (within observed limits) for nucleotide combinations instead of measured values.

**Probability of re-usage of sequences.** To calculate the probability of a sequence in an immunized fish, based on that sequence being a shared on a non-shared sequence we followed the following procedure. For a group  $M$  including all CDR3 sequences in immunized fish, and a group  $N$  including all CDR3 sequences sequenced in naïve fish, we tagged a sequence  $s$

$$s \in N$$

according to whether or not it was shared within the naïve group. A sequence was tagged **public** if it was shared between at least two fish

$$S_{public}: s \in N_i, s \in N_j; i \neq j$$

And define  $S = \{S_{public}\}$

The probability of observing a CDR3 sequence  $z$  in an immunized fish, based on its inclusion as a public sequence was therefore:

$$p(z \in M | z \in S)$$

Then, given the following table:

| $z$                   | $z \notin M$ | $z \in M$ |
|-----------------------|--------------|-----------|
| $z \notin S, z \in N$ | $n_{0,0}$    | $n_{0,1}$ |
| $z \in S$             | $n_{1,0}$    | $n_{1,1}$ |

Where  $n_{i,j}$  is the number of sequences in each sub category, the probability becomes:

$$p(z \in M | z \in S) = \frac{n_{1,1}}{n_{1,0} + n_{1,1}}$$

This value was easily obtained from available sequence annotations and was calculated for different groups in Figure 4.

In a similar manner, to obtain the probability of observing a sequence in the immunized group, based on the fact it was not a shared sequence in naïve fish, we calculated the probability:

$$p(z \in M | z \notin S) = \frac{n_{0,0}}{n_{0,0} + n_{0,1}}$$

We then used bootstrapping to obtain significance values, re-sampling with repetitions from the population of naïve sequences to obtain sequence pools and comparing with the immunized repertoire. This process was repeated 1000 times to produce distributions for  $p(z \in M | z \in S)$  and for  $p(z \in M | z \notin S)$ .

**V(D)J combinations.** For each sequence, V D and J were identified according to the above section. As the ability to produce sequences without the use of the D segment is unique to zebrafish, we further divided the plots to the VJ usage with or without D segment. The Unique repertoire is defined as the subset of the total repertoire, without repetitions. Multiple usages of the same VJ pairs may appear even in the Unique repertoire, as multiple CDR3 sequences may originate from the same V(D)J segments.

**Nucleotide sequence sharing.** To compute CDR3 nucleotide or aa sequence sharing we first found all the unique sequences within a group and then we created a Venn diagram using "VENNY" tool representing the number of shared nucleotide sequences in all the different group combinations.

**Convergent recombination.** For each nucleotide sequence we found its amino-acid sequence, the groups sharing this nucleotide sequence and the groups sharing the amino-acid sequence. We counted the number of nucleotides passed from one combination of the groups to another - represent convergence. We visualized the results using Circos software package.

**Calculating the upper and lower limit of TCR species.** To estimate the potential number of zebrafish TCRab species we used our measurements of total TCRA and TCRb repertoires. Since the TCRab is composed of TCRA and TCRb chains, these limits are based on the possible combinations of the two chains. Calculation of the upper limit is a straightforward calculation of all possible combinations of TCRA and TCRb chains. That is, if we denote the upper limit as  $N_{upper}$  with  $N_{alpha}$  as the total number of unique TCRA sequences and  $N_{beta}$  as the total number of unique TCRb sequences. Then

$$N_{upper} = N_{alpha} \times N_{beta}$$

To calculate the lower limit of zebrafish TCRab species we used the number of copies detected of each TCRA and TCRb chain sequence. For example, we expect the most highly abundant TCRb chain to co-exist with the most highly abundant TCRA chain. Thus, to estimate the lower possible number of zebrafish TCRab species we matched the rankings of the copy numbers of TCRA and TCRb chains. That is, in the matrix  $M$  in which rows are the unique set of TCRA chains and of which columns are the unique set of TCRb chains, we tagged with 1 identical ranking from both sets.

The pseudo code for this is therefore:

*if* ( $rank(alpha(i)) == rank(beta(j))$ )  
*then*

$$m(i, j) = 1$$

Since TCRA chains and TCRb chains do not have the same number of unique clones, and since this estimate is in essence an upper limit to the lower estimate, we spanned the vector of ranking of the alpha sequences to provide a complete overlap (an identical number of elements) to the beta vector. The pseudo code thus becomes

*if* ( $spanned\_rank(alpha(i)) == rank(beta(j))$ )  
*then*

$$m(i, j) = 1$$

Finally, we provide an additional layer of flexibility to the estimate, but relaxing the exact match to allow for nearest neighbor match on the matrix, that is:

*if* ( $spanned\_rank(alpha(i \pm 1)) == rank(beta(j \pm 1))$ )  
*then*

$$m(i, j) = 1$$

Which is the final (pseudo) code used for matrix assignment. The lower limit of zebrafish TCRab combinations was then calculated as a sum over the values of the matrix.

These calculations generated the matrix visualized in **Fig. 7**. We subsampled this hypothetical repertoire to represent the roughly 200,000 T cells in each fish. We sampled without repetition from the distribution of TCRab combinations described above. The mode of sampling has been determined so as to make sure the composition of the single fish repertoire maintains the rules of the distribution dictated by the possible combination of TCRA and TCRb sequences. To study the stability of these results we repeated the procedure 1000 times. The obtained result over 1000 repetitions has been  $(1.7 \pm 0.002) \times 10^5$  and is therefore extremely stable.
